# Supplementary material
Source: publisher site journal article supplement (https://www.dovepress.com/article/supplementary_file/590456/590456-Supplementary%20Table%20S1_2.xlsx)
Supplement: Supplementary file 1 [file 590456-Supplementary%20Table%20S1_2.xlsx]

## Sheet: Sheet1
Supplementary Table S1: Comprehensive Evidence Table: Herbal Compounds Targeting four Intestinal Barriers in UC
Compound Name	Study Design	Modeling Method	Microbial Changes	Metabolites / Receptor Pathways	Conclusion	Reference
Berberine	In vivo	ETEC-challenged weaned piglets	Suppressed proliferation of E. coli; improved overall microbiota homeostasis	Reduced luminal LPS; upregulated ZO-1, Claudin-1, Occludin; reduced apoptosis	Alleviates ETEC-induced intestinal mucosal barrier damage via modulation of the intestinal microbiome.	Du M, et al. (2024), Front Nutr. [110]
Polysaccharides from Astragalus membranaceus and Codonopsis pilosula	In vivo	DSS-induced acute colitis in mice	Recovered intestinal flora structure; stimulated Faecalibacterium prausnitzii	AhR activation; upregulated isovaleric acid and butyrate	Ameliorates colitis by activating AhR and upregulating specific SCFAs through synergistic microbiota modulation.	Tang S, et al. (2021), J Ethnopharmacol. [111]
Lycium barbarum polysaccharide (LBP)	In vivo & In vitro	DSS-induced chronic UC in mice / LPS-induced Caco-2 cells	Enriched Ruminococcaceae, Lactobacillus, Butyricicoccus, Akkermansia; reduced Mucispirillum, Sutterella	SCFAs (acetic, propionic, butyric acid); Nrf2 pathway; tight junction proteins	Alleviates chronic UC by restoring intestinal barrier function and exerting strong prebiotic effects.	Li ZY, et al. (2023), Ann Med. [112]
Ginsenoside Rg1	In vivo	DSS-induced colitis in obese mice	Increased α-diversity; normalized F/B ratio; enriched Rikenellaceae, Lachnospiraceae, Alistipes; reduced Romboutsia	Lipid metabolism; Th1/Th2/Th17 cell differentiation axis	Effectively alleviates obesity complicated by colitis through the regulation of gut microbiota and Th1/Th2/Th17 cells.	Zhong Y, et al. (2023), J Agric Food Chem.[115]
Polygonum hydropiper L. and Coptis chinensis	In vivo	DSS-induced colitis in mice	Restored α-diversity; stabilized the microbial network	Modulated metabolism; NLRP3/Caspase-1 pathway	Attenuates DSS-induced UC by improving colonic morphology, modulating metabolism, and regulating intestinal flora.	Zhu F, et al. (2025), Food Sci Nutr. [116]
Poria cocos polysaccharides	In vivo	DSS-induced colitis in mice	Promoted diversity and abundance of beneficial gut microbiota	NF-κB signaling pathway; ZO-1 and Claudin-1	Ameliorates colitis symptoms by reducing NF-κB signaling activation to mitigate inflammation and regulating gut microbiota.	Song X, et al. (2024), Molecules.[117]
Quercetin	In vivo	DSS-induced colitis in mice	Modulated microbiota composition; increased Clostridium_XIVa and Clostridium_XI	Isovanillic acid (IVA); restored mature MUC2 synthesis	Boosts gut microbiota-driven production of IVA to alleviate colitis by enhancing intestinal barrier function.	Lei L, et al. (2025), Curr Res Food Sci. [123]
Berberine	In vivo	DSS-induced colitis in mice	Specifically enriched Akkermansia muciniphila	Propionate (SCFA); upregulated MUC2; suppressed IL-1β in myeloid cells	Suppresses colon inflammation via integrated modulation of host metabolism, microbial ecology, and innate immune signaling.	Xiao Y, et al. (2026), Theranostics. [124]
Berberine	In vivo	ETEC-challenged weaned piglets	Enriched beneficial genera such as Megasphaera	Bile acid metabolism; upregulated colonic TFF3 transcription	Accelerates mucosal repair and overall barrier fortification by linking microbiota remodeling to TFF3 upregulation.	Nie X, et al. (2024), Front Microbiol. [125]
Paeoniflorin (PF) / Total glucosides of peony	In vivo	DSS-induced colitis in mice	Modulated gut microbial production of specific metabolites	Indole-3-lactate (ILA); epithelial autophagy machinery	Alleviates colitis by reducing microbial ILA accumulation, thereby unleashing protective epithelial autophagy.	Fan Q, et al. (2020), Phytomedicine. [128]
Resveratrol	In vivo	DSS-induced colitis in mice	Enhanced the abundance of Akkermansia muciniphila	Transmembrane mucin expression; induction of Tregs; suppression of Th17 cells	Prevents murine colitis development through microbiota modulation and Th17/Treg immune cell regulation.	Alrafas HR, et al. (2019), J Leukoc Biol. [132]
Mulberry anthocyanins	In vivo	DSS-induced colitis in mice	Reduced Escherichia-Shigella; increased Akkermansia, Muribaculaceae, Allobaculum	Upregulated tight junction proteins (occludin, claudin-1, ZO-1)	Ameliorates DSS-induced UC by improving intestinal barrier function and modulating specific gut microbiota.	Mo J, et al. (2022), Antioxidants. [135]
Polyphenols-rich Portulaca oleracea L.	In vivo	DSS-induced colitis in mice	Restored microbiota; enriched Butyricicoccus, Dorea, Bifidobacterium	Acetate, lactate, butyrate; GPR41 activation; cross-feeding F. prausnitzii	Alleviates UC through restoring the intestinal barrier, gut microbiota, and SCFA cross-feeding metabolites.	Li Z, et al. (2025), Food Chem. [136]
Andrographolide	In vivo	DSS-induced colitis in mice	Suppressed LPS-producing Enterobacteriaceae	MAPK/NLRP3 pathways; NLRP3-mediated pyroptosis; Th17/Treg balance	Alleviates DSS-induced IBD by regulating inflammation, pyroptosis, and Th17/Treg balance via microbial shifts.	Zhang HL, et al. (2025), Mol Immunol. [141]
Berberine	In vivo	DSS-induced colitis in mice	Increased Lactobacillus/Lactococcus; decreased Bacteroides, Enterobacteriaceae	Wnt/β-catenin pathway; suppressed ILC1; enhanced ILC3s/IL-22	Ameliorates DSS-induced intestinal mucosal barrier dysfunction through microbiota-dependence and immunomodulation.	Dong Y, et al. (2022), Int J Biol Sci. [148]
Curcumin nanoparticles	In vivo	DSS-induced colitis in mice	Enriched SCFA-producing microbiota (e.g., Lactobacillus)	Elevated butyrate; TLR4/NF-κB suppression; Nrf2 activation; GPR43 activation	Ameliorates UC via synergistic TLR4/NF-κB suppression, intestinal barrier restoration, and gut microbiota modulation.	Li S, et al. (2025), Front Pharmacol.[152]
Puerarin	In vivo	DSS-induced colitis in mice	Attenuated pathological over-enrichment of Akkermansia muciniphila	Suppressed Amuc_2172-triggered M1 macrophage activation	Ameliorates colitis by direct suppression of macrophage M1 polarization in the compromised mucosal niche.	Tao Q, et al. (2024), Phytomedicine.[154]
Codonopsis pilosula polysaccharide	In vivo	DSS-induced colitis in mice	Enriched beneficial bacteria (Ligilactobacillus, Akkermansia)	Acetic/butyric acid; GPR receptors; suppressed NLRP3 inflammasome	Alleviates UC by modulating gut microbiota and the downstream SCFA/GPR/NLRP3 inflammatory pathway.	Zhou J, et al. (2025), J Ethnopharmacol. [155]
Astragalus polysaccharides	In vivo	DSS-induced colitis in mice	Restored SCFA-producing microbiota	Elevated SCFAs; inhibited NF-κB via TLR4 and HDAC3; Th17/Treg homeostasis	Alleviates DSS-induced UC by restoring SCFA production and regulating Th17/Treg cell homeostasis in a microbiota-dependent manner.	Zhang Y, et al. (2025), Carbohydr Polym.[158]
